# Supplementary material for: Antimicrobial Activity the Essential Oil from Croton pluriglandulosus Carn. Leaves against Microorganisms of Clinical Interest
Source: MDPI journal article supplement (doi:10.3390/jof9070756), 2023-07-17
Supplement: s1 [file s1]

**Supplementary Table S1.** Main chemical components of *C. pluriglandulosus* essential oil by GC-MS analysis.

|                         | RT     | Compounds                   | Area (%)     |
|-------------------------|--------|-----------------------------|--------------|
| 1                       | 5.994  | <i>p</i> -cymene            | 0.69         |
| 2                       | 6.133  | eucalyptol (1,8-cineole)    | 3.75         |
| 3                       | 9.101  | epoxy-ocimene               | 0.21         |
| 4                       | 10.134 | 4-terpineol                 | 0.31         |
| 5                       | 10.528 | $\alpha$ -terpineol         | 2.65         |
| 6                       | 14.611 | $\delta$ -elemene           | 2.86         |
| 7                       | 15.918 | $\beta$ -elemene            | 0.17         |
| 8                       | 16.115 | $\beta$ -elemene            | 3.88         |
| 9                       | 16.508 | methyl eugenol              | 3.02         |
| 10                      | 16.649 | 1,3,5-trimethoxy-benzene    | 6.86         |
| 11                      | 16.741 | $\alpha$ -cis-bergamotene   | 0.15         |
| 12                      | 16.894 | caryophyllene               | 8.99         |
| 13                      | 17.251 | $\alpha$ -trans-bergamotene | 0.87         |
| 14                      | 17.675 | neryl acetone               | 0.09         |
| 15                      | 17.763 | $\alpha$ -humulene          | 1.44         |
| 16                      | 17.953 | allo-aromadendrene          | 0.44         |
| 17                      | 18.926 | bicyclogermacrene           | 9.37         |
| 18                      | 20.193 | hedycaryol                  | 6.21         |
| 19                      | 20.547 | elemicin                    | 25.77        |
| 20                      | 20.977 | spathulenol                 | 2.96         |
| 21                      | 21.12  | epiglobulol                 | 2.17         |
| 22                      | 21.329 | globulol                    | 0.31         |
| 23                      | 21.937 | 2,4,6-trimethoxy-styrene    | 3.96         |
| 24                      | 22.782 | epi- $\alpha$ -muurolol     | 0.46         |
| 25                      | 23.228 | brevifolin                  | 4.60         |
| 26                      | 23.46  | $\alpha$ -bisabolol         | 0.17         |
| 27                      | 24.232 | 2Z,6Z-farnesol              | 0.54         |
| 28                      | 24.705 | 2Z,6E-farnesal              | 0.28         |
| <b>Total identified</b> |        |                             | <b>93.18</b> |

RT—Retention time (min); Area (%)—Relative area percentage.
